# Supplementary material for: Significantly Elevated FMR1 mRNA and Mosaicism for Methylated Premutation and Full Mutation Alleles in Two Brothers with Autism Features Referred for Fragile X Testing
Source: PubMed Central journal article supplement (PMC6721168; doi:10.3390/ijms20163907), 2019-08-11
Supplement: ijms-20-03907-s001.pdf [file ijms-20-03907-s001.pdf]

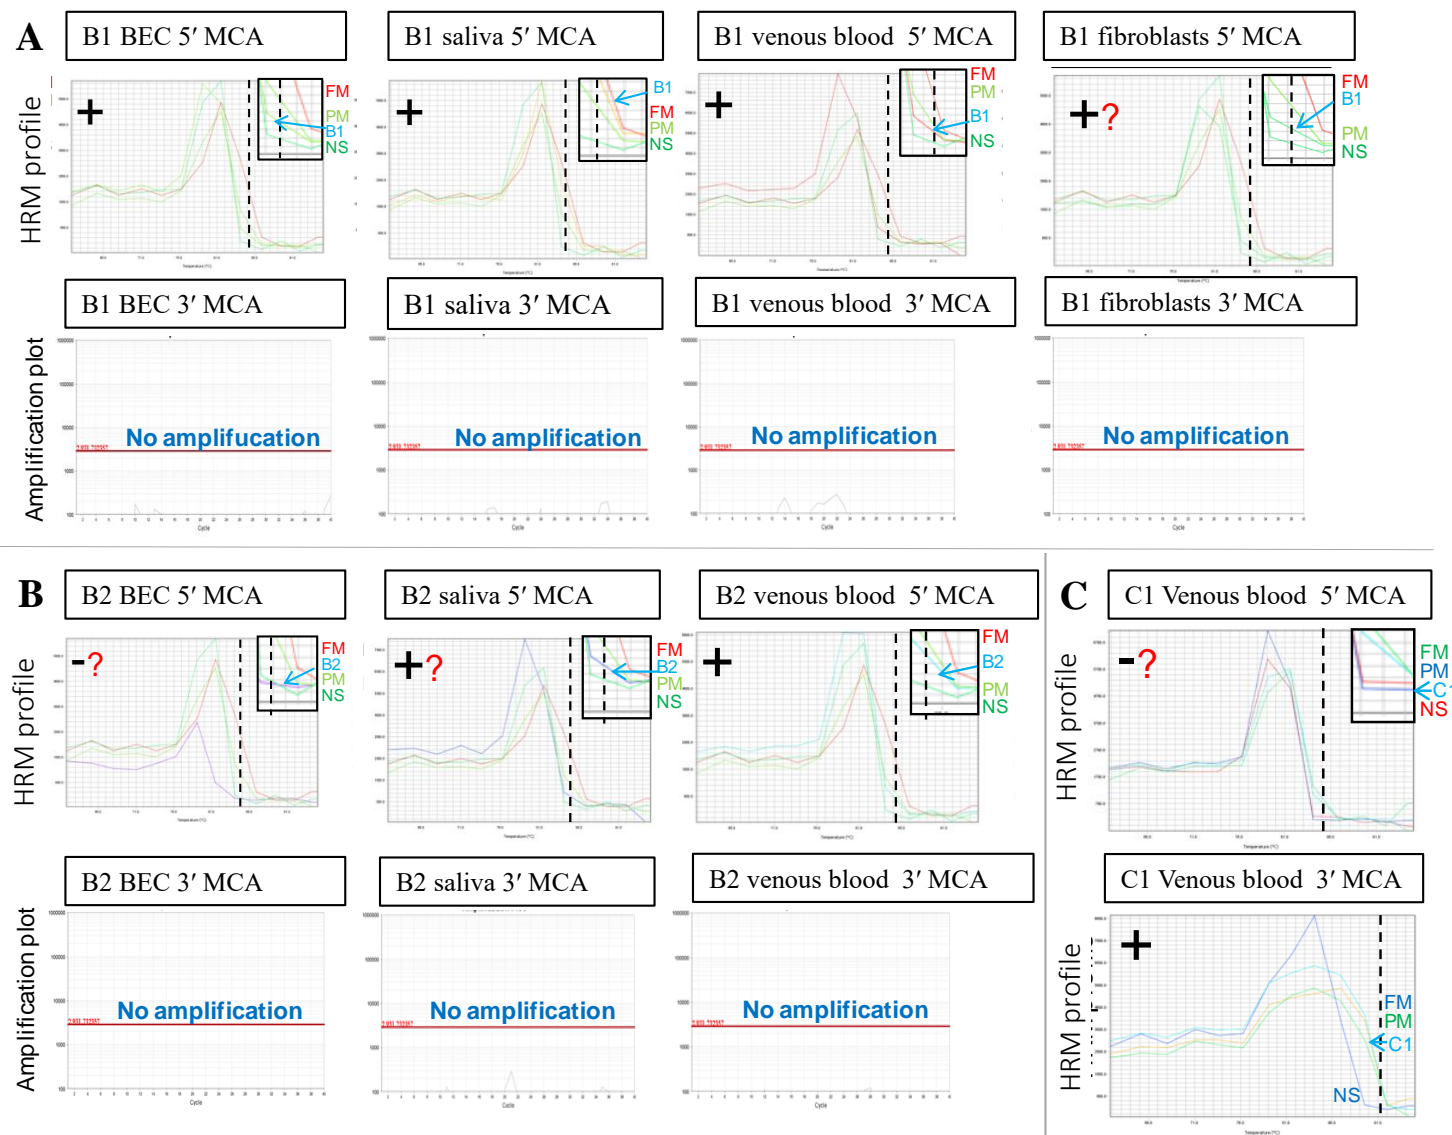

**Supplemental Figure 1.** FastFraX triplet-primed PCR results using 5'MCA and 3'MCA assays for B1 **(A)** in Buccal Epithelial Cell (BEC), saliva, venous blood and fibroblasts DNA, for B2 **(B)** in BEC, saliva, and venous blood, and for C1 **(C)** in venous blood. *Note:* Reference male samples co-run with the samples in question included a FM (530 CGG), a PM (170 CGG) and a normal size (NS) control (30 CGG). ? Indicates uncertain calls where the difference in the profile fluorescence at the melting temperature threshold (85°C for 5'MCA; 90 °C for 5'MCA) is insufficient to differentiate the sample in question from NS. (+) indicates positive call; (-) indicates negative call. It appears that 5'MCA assay missed PM allele calls in B2 BEC and C1 venous blood.

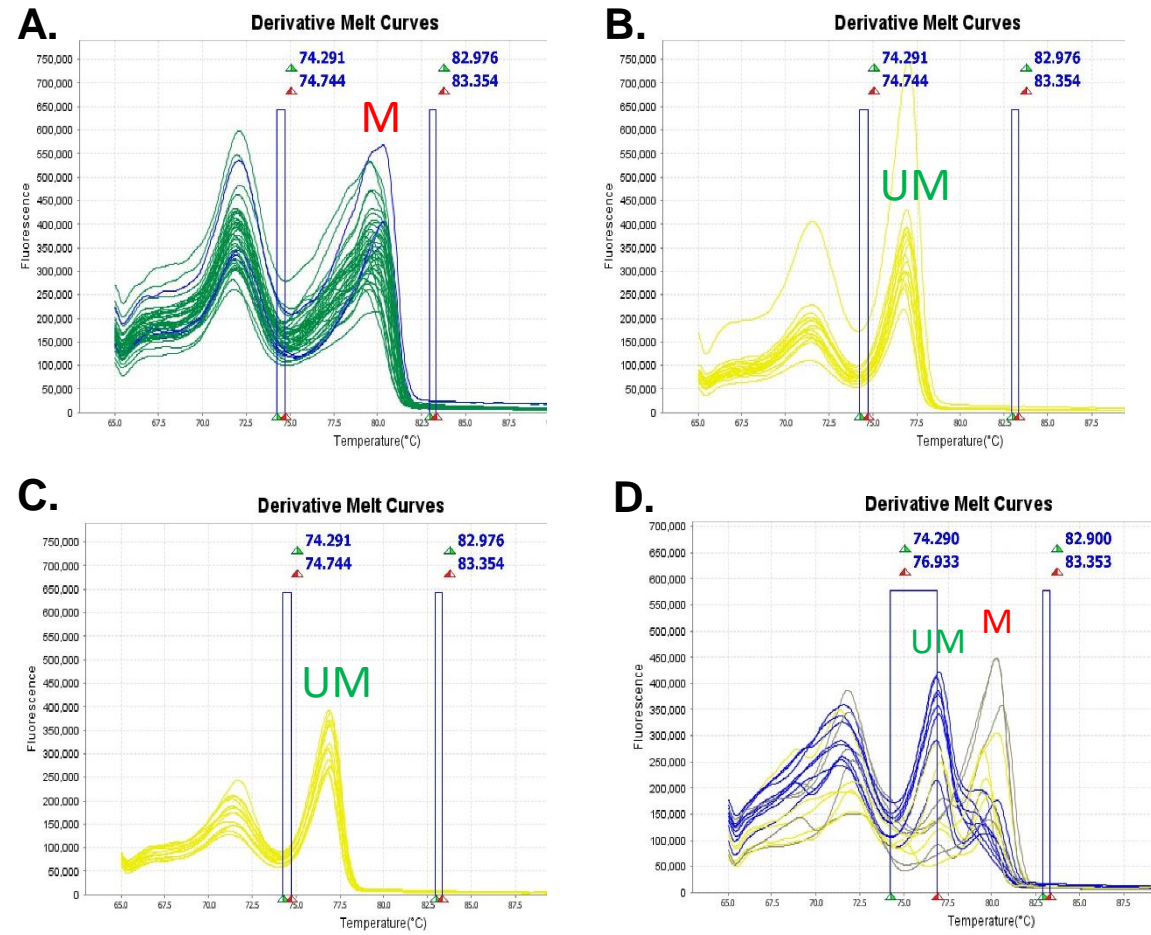

**Supplemental Figure 2.** Derivative curve high resolution melt profiles from the FREE2 MS-QMA assay between in blood DNA reference samples from (A) 41 FM only; (B) 14 PM; (C) 17 controls; and (D) 18 PM/FM mosaic males co-run with the samples in question. Note: M = methylated alleles; UM = unmethylated alleles.

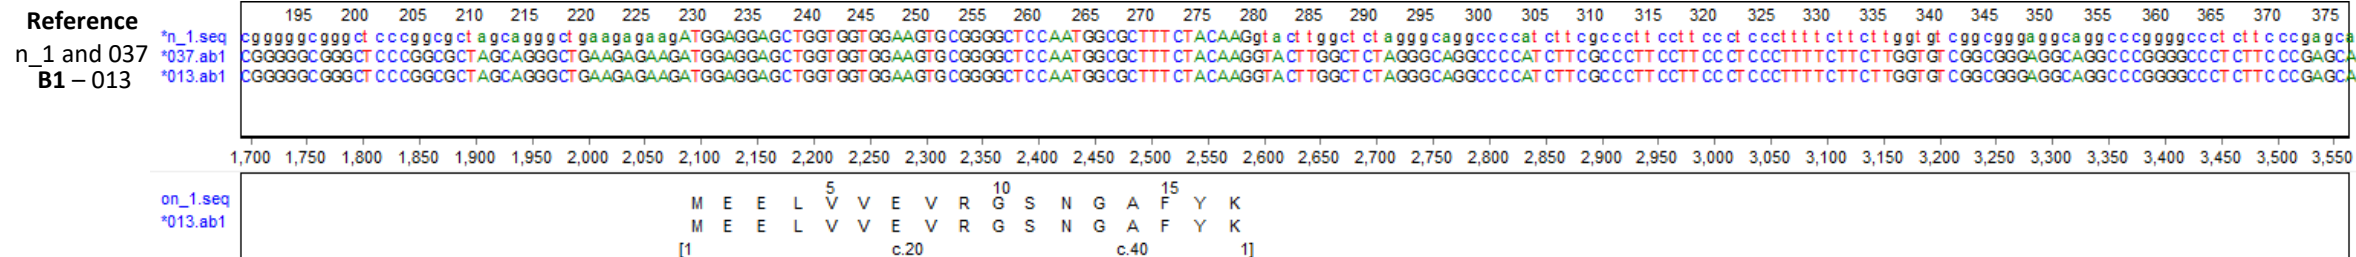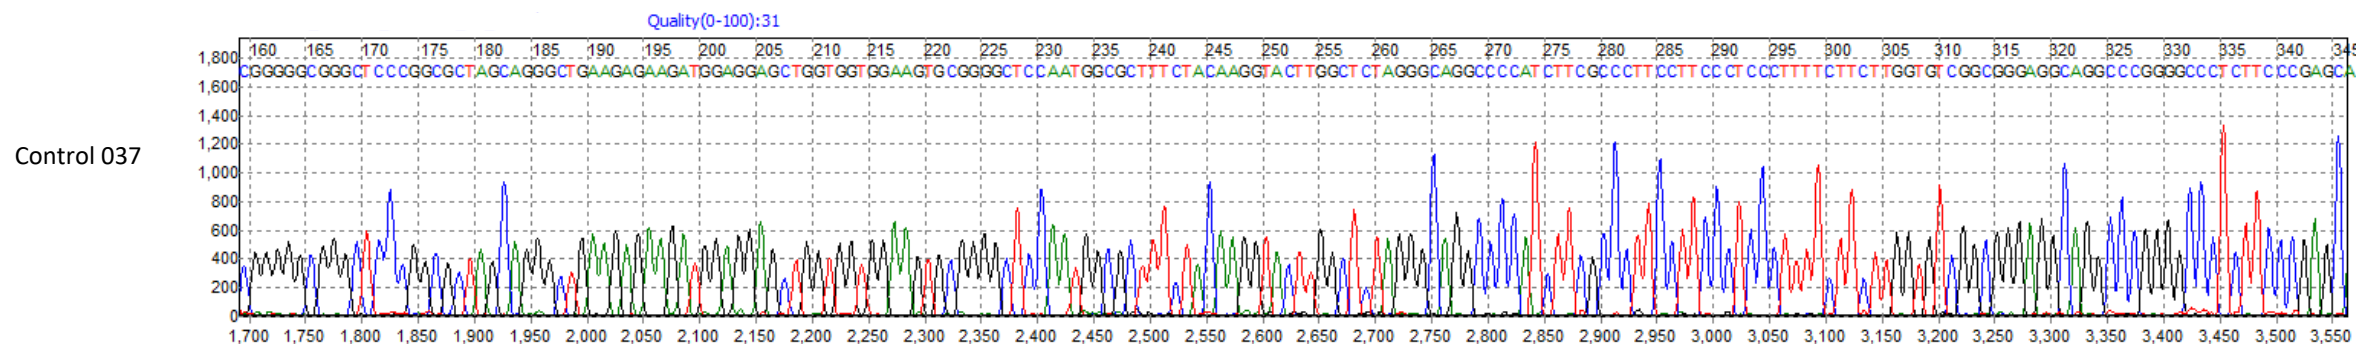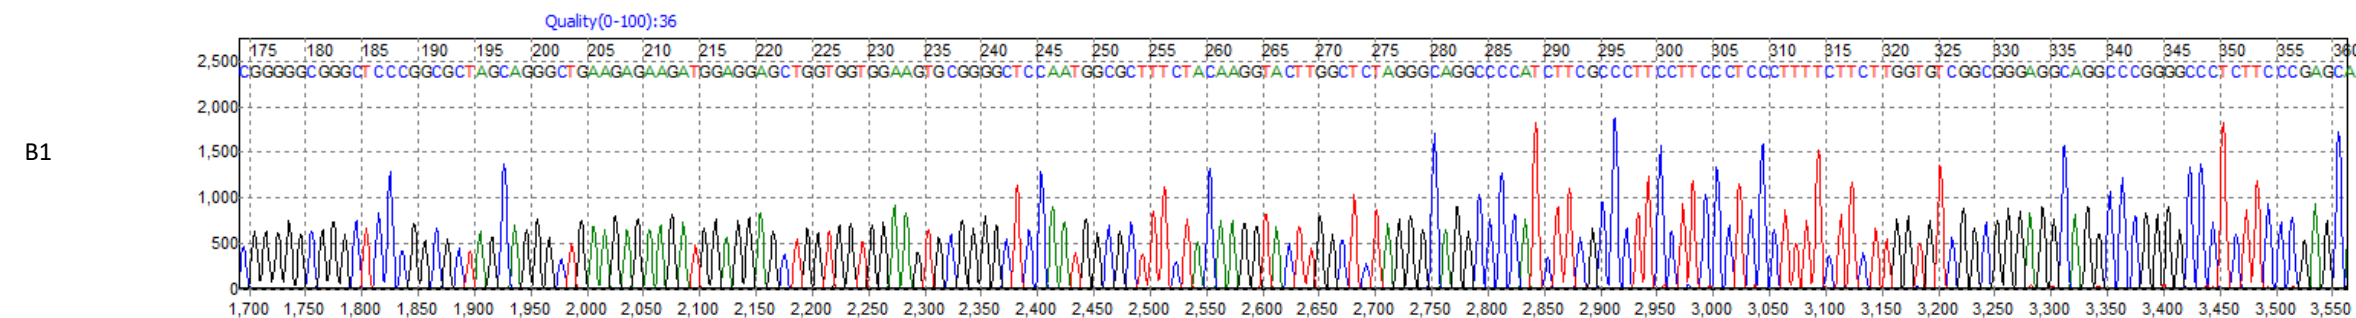

**Supplemental Figure 3.** Sanger sequencing within of the 3′MCA *FMR1* exon 1 binding site inclusive of the ATG translation start site, and surrounding regions detected no sequence variants in blood of B2 (013.ab1 sequence) as compared to 2 reference samples (Controls n\_1.seq and O37.ab1) from typically developing controls.

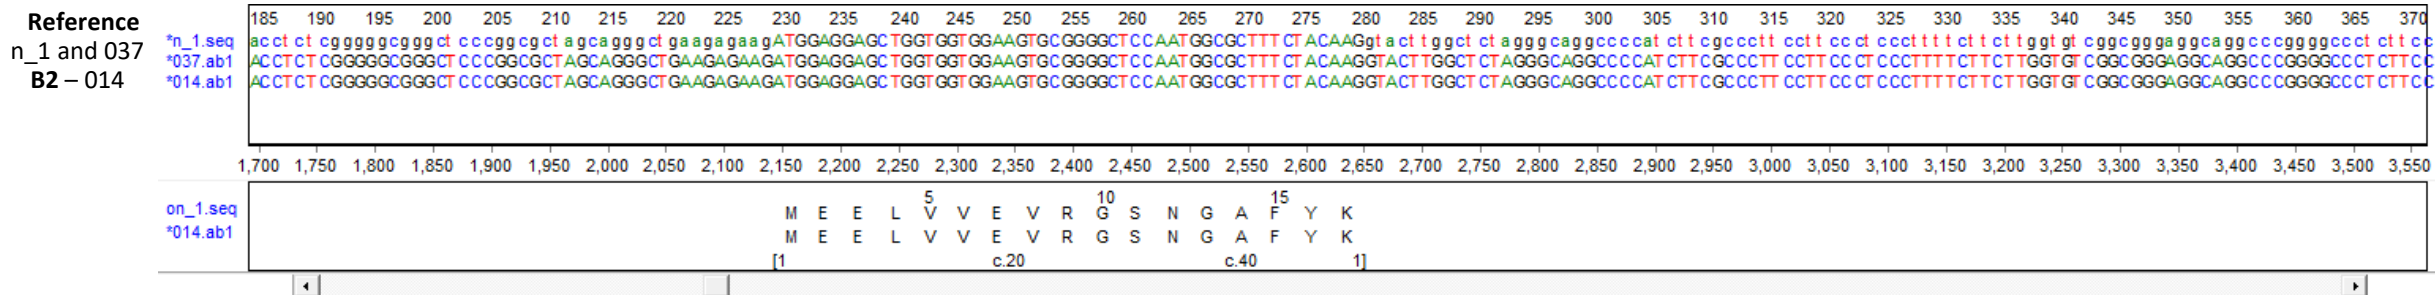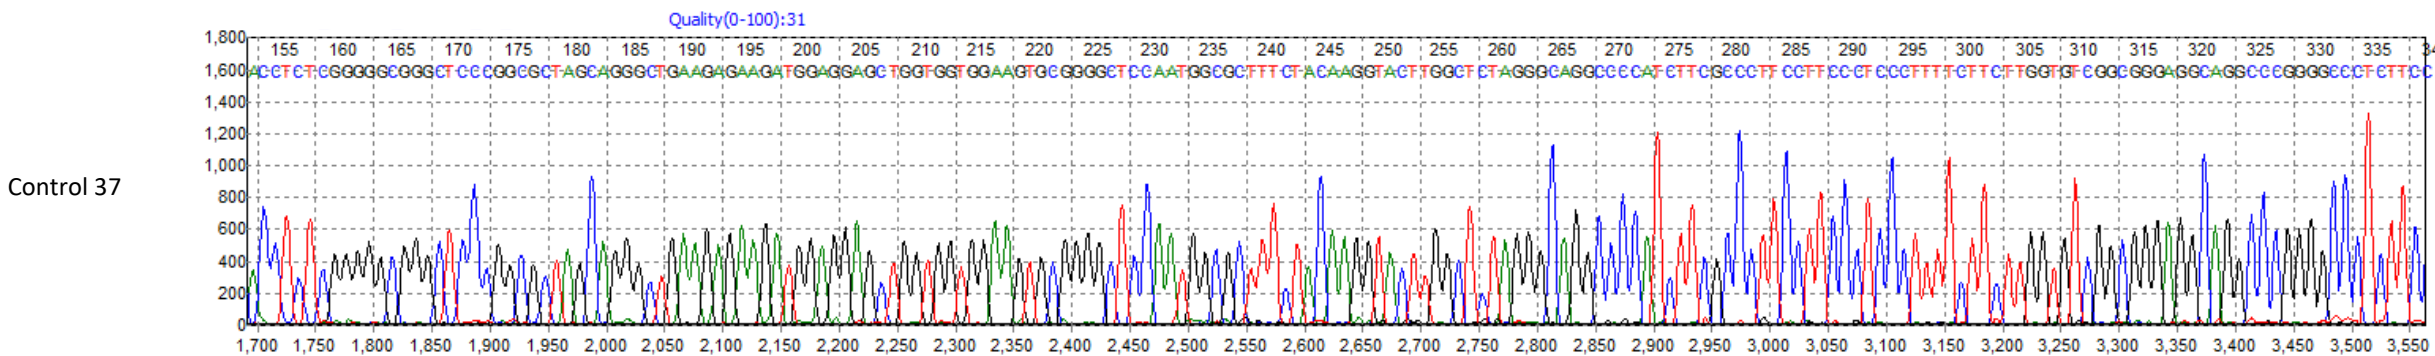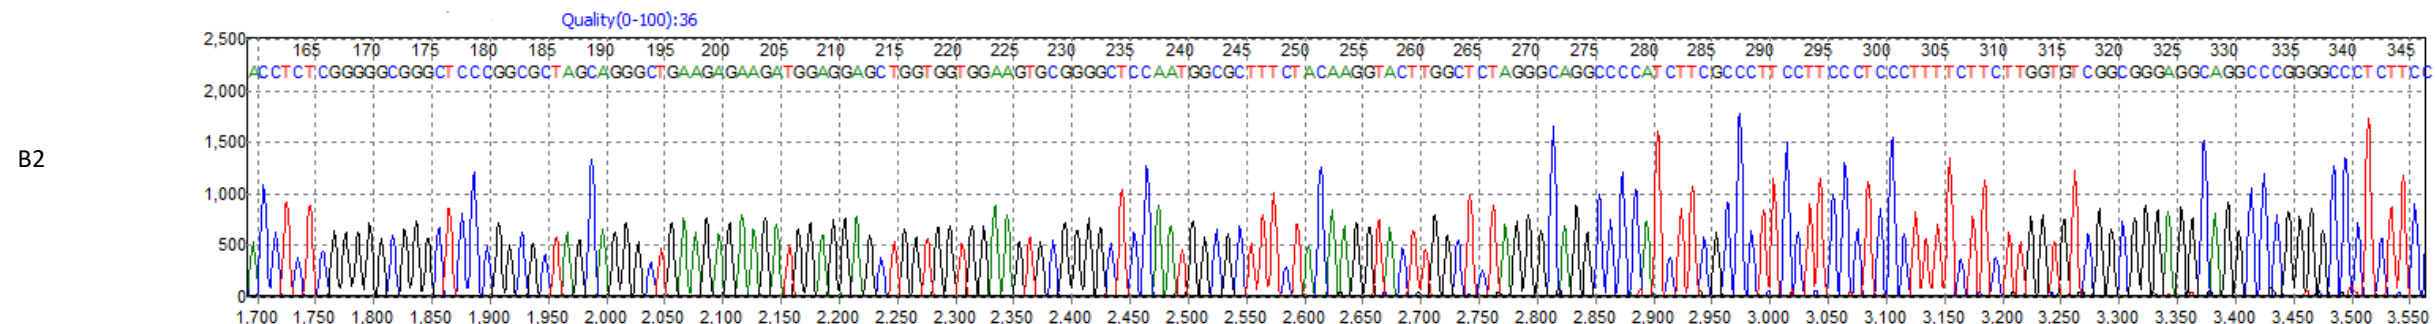

**Supplemental Figure 4.** Sanger sequencing within of the 3’MCA *FMR1* exon 1 binding site inclusive of the ATG translation start site, and surrounding regions detected no sequence variants in blood of B2 (014.ab1 sequence) as compared to 2 reference samples (Controls n\_1.seq and 037.ab1) from typically developing controls.
